# Supplementary material for: The Koala ( Phascolarctos cinereus ) faecal microbiome differs with diet in a wild population
Source: PeerJ journal article supplement (doi:10.7717/peerj.6534), 2019-04-01

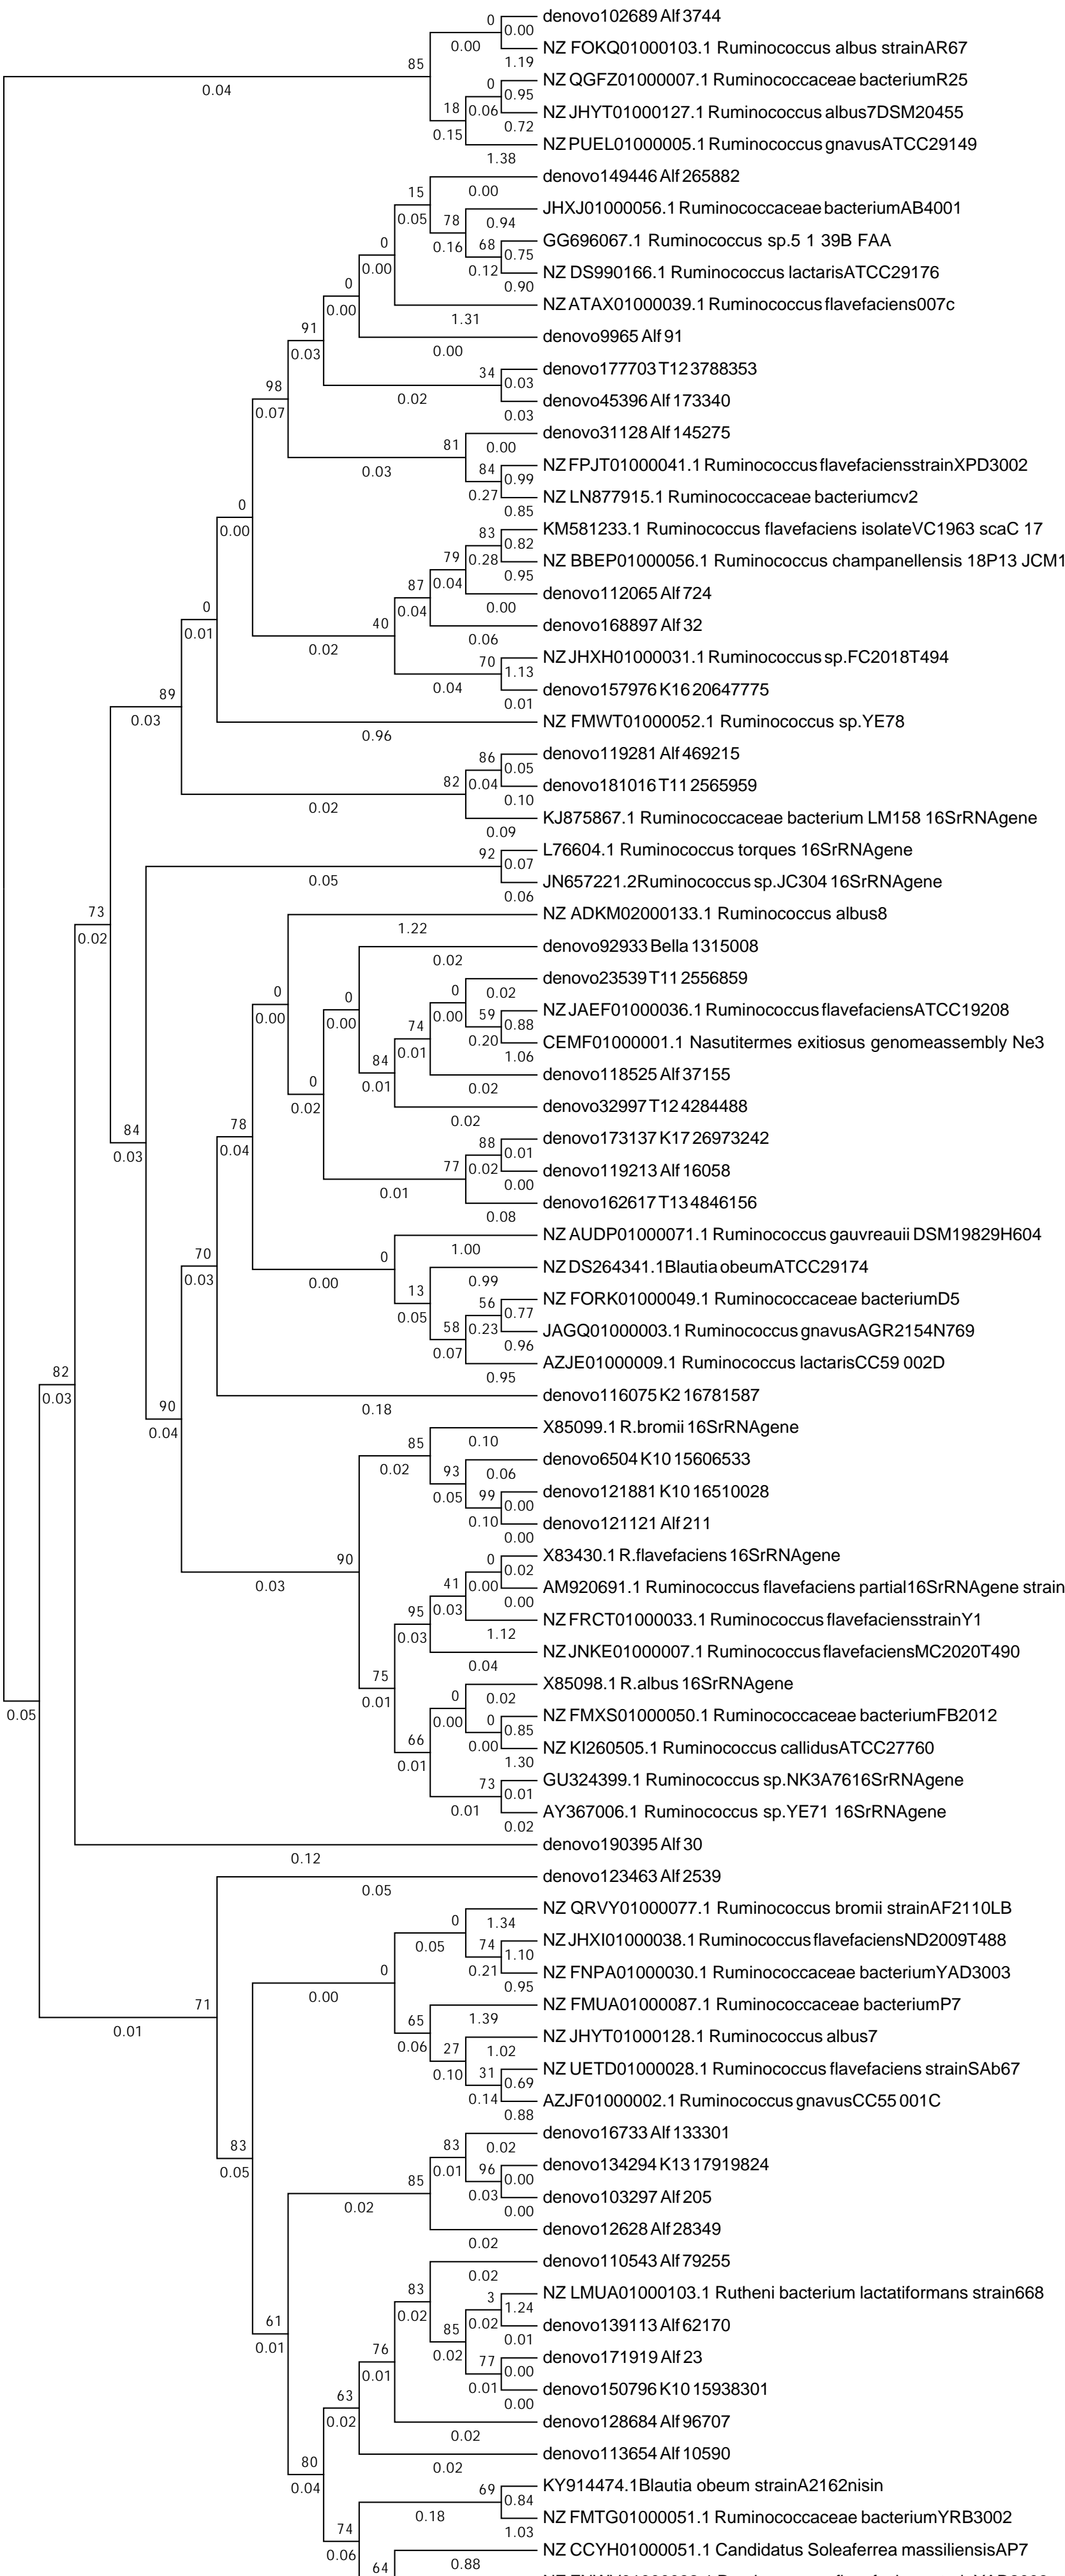

Supplement: Brice_et_al_2018_Figure_S9.pdf [file Brice_et_al_2018_Figure_S9.pdf]
