# Supplementary material for: The Koala (Phascolarctos cinereus) faecal microbiome differs with diet in a wild population
Source: PubMed Central journal article supplement (PMC6448554; doi:10.7717/peerj.6534), 2019-04-01

Legend

- *Eucalyptus viminalis*
- *Eucalyptus obliqua*

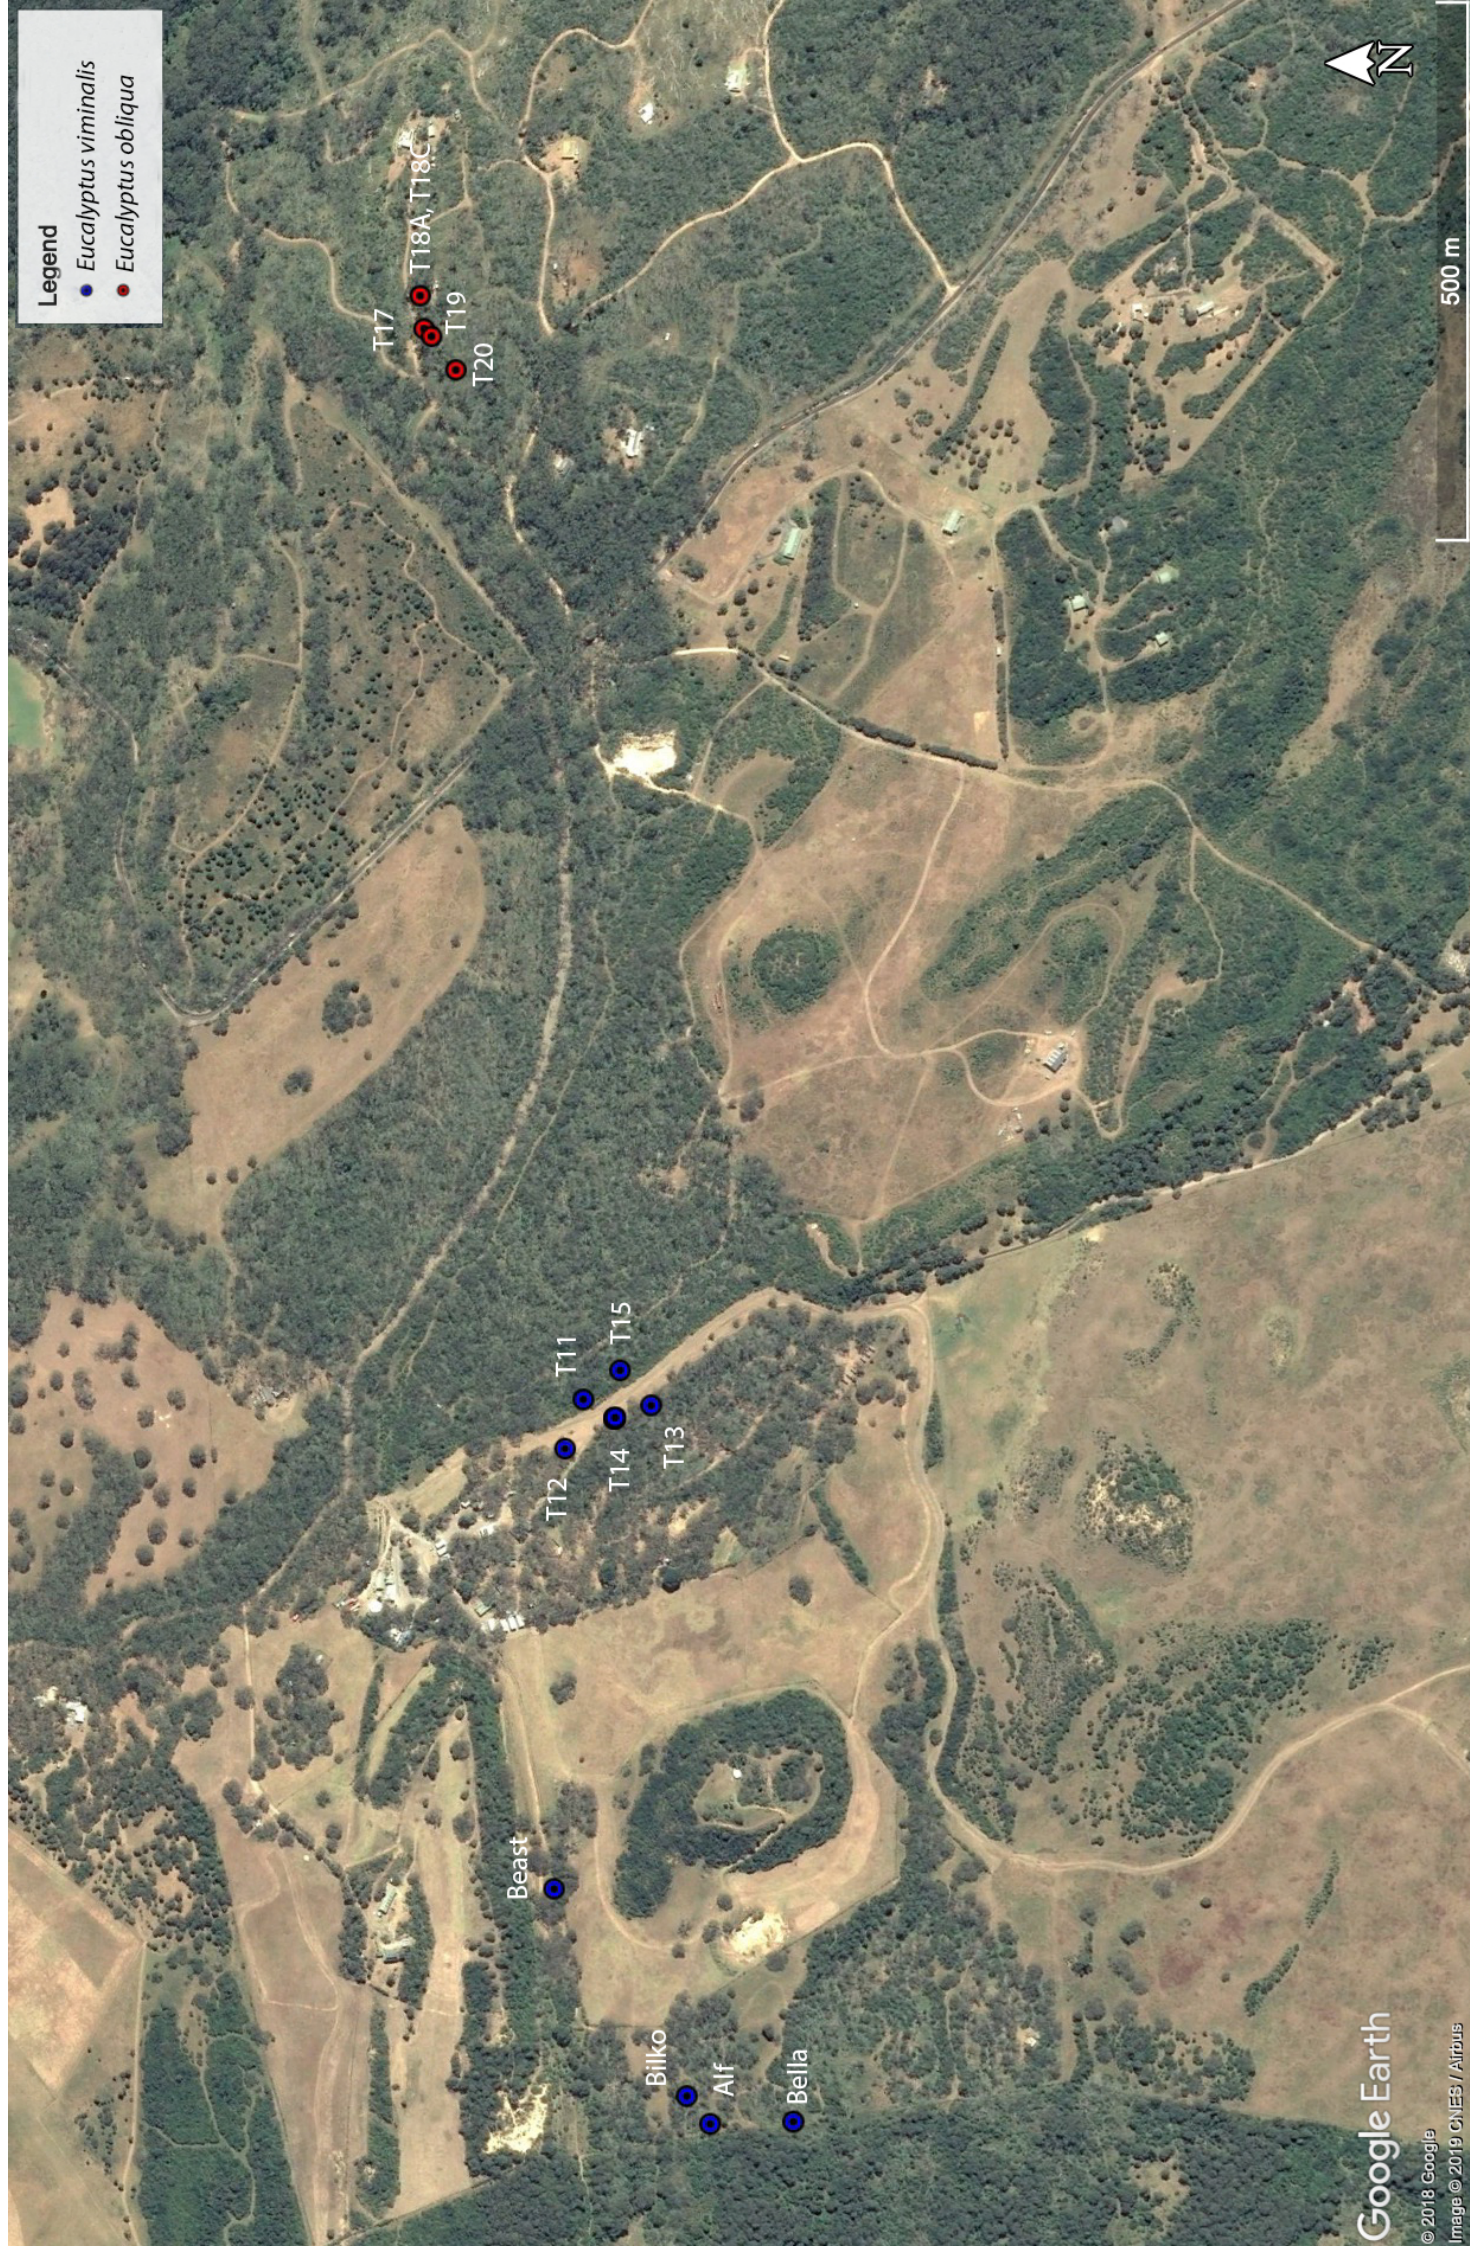

Supplement: peerj-07-6534-s002.pdf [file peerj-07-6534-s002.pdf]
