# Supplementary material for: The Koala (Phascolarctos cinereus) faecal microbiome differs with diet in a wild population
Source: PubMed Central journal article supplement (PMC6448554; doi:10.7717/peerj.6534), 2019-04-01

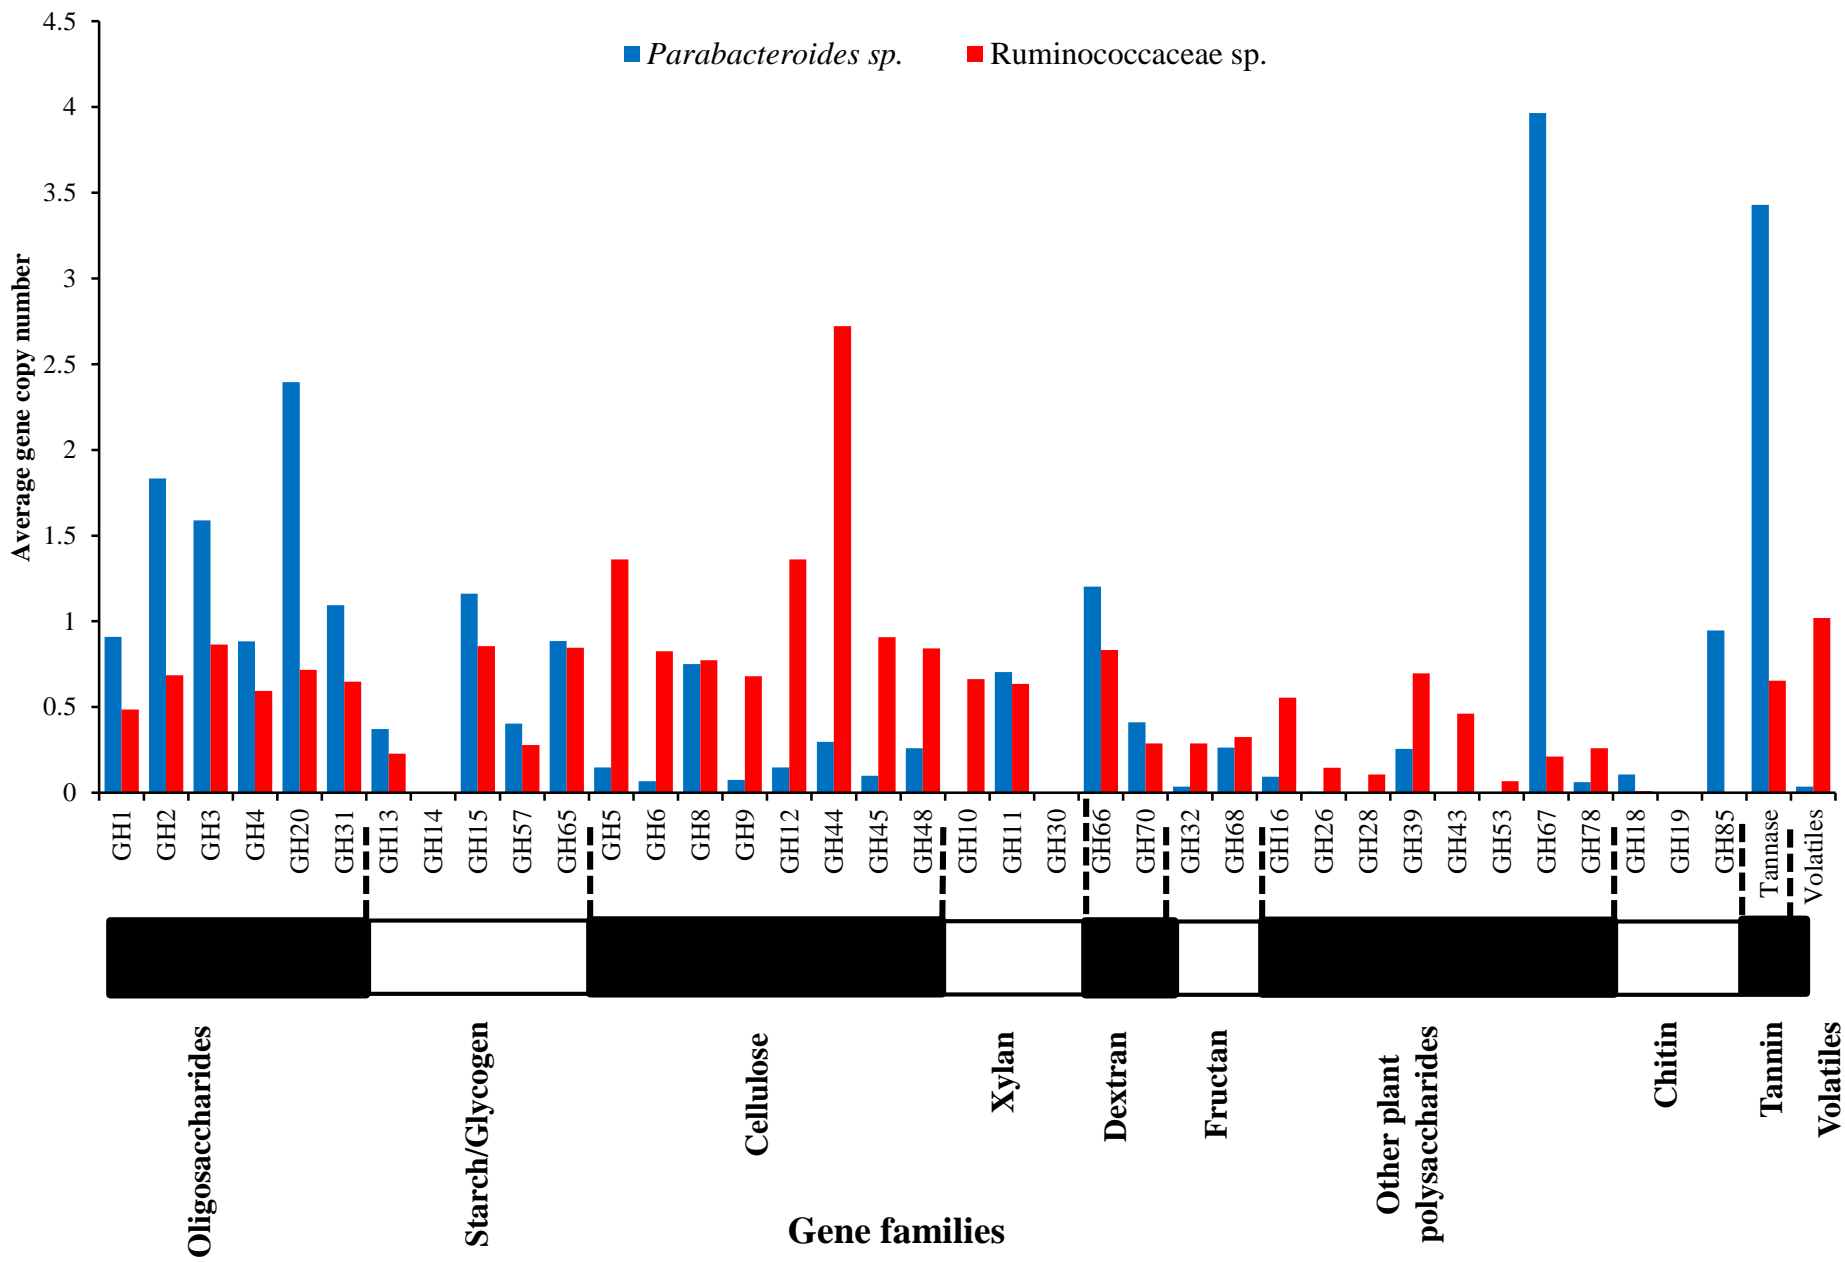

Supplement: peerj-07-6534-s008.pdf [file peerj-07-6534-s008.pdf]
