# Supplementary material for: The Koala (Phascolarctos cinereus) faecal microbiome differs with diet in a wild population
Source: PeerJ. 2019 Apr 1;7:e6534. doi: 10.7717/peerj.6534 (PMC6448554; doi:10.7717/peerj.6534)
Supplement: Table S5 — Complete or draft linear genomes (at least 30 × coverage) of 35 bacteria from Parabacteroides and 45 from Ruminococcaceae. The genomes and their information were sourced from the Joint Genomes Institute (JGI) through the Integrated Microbial Genomes and Microbiomes (IMG) portal. The website is available through https://img.jgi.doe.gov/cgi-bin/mer/main.cgi. [file peerj-07-6534-s017.xlsx]

## Sheet: taxontable90773_21-jul-2016.xls
Taxon_oid	Domain	Status	Study Name	Genome Name / Sample Name	Sequencing Center	IMG Genome ID	Phylum	Class	Order	Family	Genus	Species	NCBI Taxon ID	GOLD Study ID	GOLD Project ID	GOLD Analysis Project ID	Strain	Is Public	Bioproject Accession	Biosample Accession	Biotic Relationships	Cell Arrangement	Cell Shape	Culture Type	Cultured	GOLD Sequencing Strategy	Habitat	Host Name	Isolation	Project / Study Name	Seq Status	Sequencing Method	Genome Size * assembled	Gene Count * assembled	Scaffold Count * assembled	CRISPR Count * assembled	GC Count * assembled	GC * assembled	Coding Base Count	Coding Base Count %	Coding Base Count NP	Coding Base Count NP %	CDS Count * assembled	CDS % * assembled	RNA Count * assembled	RNA % * assembled	rRNA Count * assembled	5S rRNA Count * assembled	16S rRNA Count * assembled
2660238380	Bacteria	Permanent Draft	Genome sequencing of gut bacterial strains from undernourished Malawian children	Parabacteroides distasonis 2b7A	Center fo Genome Sciences & Systems Biology, Washington University	2660238380	Bacteroidetes	Bacteroidia	Bacteroidales	Porphyromonadaceae	Parabacteroides	Parabacteroides distasonis	823	Gs0118163	Gp0129326	Ga0109158	2b7A	Yes	PRJEB8305	SAMEA3218008				Isolate	Yes	Whole Genome Sequencing				Parabacteroides distasonis 2b7A			4542244	4288	1060	0	2129495	0.47	4227313	93.07	4227313	93.07	4188	97.67	100	2.33	22	7	9
2588254082	Bacteria	Permanent Draft	Comparative genomics of human mucosal isolates of the enterotoxigenic Bacteroides fragilis group, etiologic agents of inflammatory diarrheal disease.	Parabacteroides distasonis 3776 D15 i	University of Maryland School of Medicine	2588254082	Bacteroidetes	Bacteroidia	Bacteroidales	Porphyromonadaceae	Parabacteroides	Parabacteroides distasonis	1339342	Gs0000094	Gp0043017	Ga0058391	3776 D15 i	Yes	PRJNA206126	SAMN02370938				Isolate	Yes	Whole Genome Sequencing				Parabacteroides distasonis 3776 D15 i	Complete		5788519	5111	100	1	2592245	0.45	5189226	89.65	5189226	89.65	4974	97.32	137	2.68	30	7	12
2588254081	Bacteria	Permanent Draft	Comparative genomics of human mucosal isolates of the enterotoxigenic Bacteroides fragilis group, etiologic agents of inflammatory diarrheal disease.	Parabacteroides distasonis 3776 D15 iv	University of Maryland School of Medicine	2588254081	Bacteroidetes	Bacteroidia	Bacteroidales	Porphyromonadaceae	Parabacteroides	Parabacteroides distasonis	1339343	Gs0000094	Gp0043051	Ga0058392	3776 D15 iv	Yes	PRJNA206127	SAMN02370939				Isolate	Yes	Whole Genome Sequencing				Parabacteroides distasonis 3776 D15 iv	Complete		5422204	4803	90	0	2428028	0.45	4848183	89.41	4848183	89.41	4694	97.73	109	2.27	20	7	6
2588254083	Bacteria	Permanent Draft	Comparative genomics of human mucosal isolates of the enterotoxigenic Bacteroides fragilis group, etiologic agents of inflammatory diarrheal disease.	Parabacteroides distasonis 3776 Po2 i	University of Maryland School of Medicine	2588254083	Bacteroidetes	Bacteroidia	Bacteroidales	Porphyromonadaceae	Parabacteroides	Parabacteroides distasonis	1339341	Gs0000094	Gp0043052	Ga0058393	3776 Po2 i	Yes	PRJNA206125	SAMN02370936				Isolate	Yes	Whole Genome Sequencing				Parabacteroides distasonis 3776 Po2 i	Complete		5288232	4723	172	1	2372574	0.45	4731164	89.47	4731164	89.47	4623	97.88	100	2.12	9	7	1
2588254085	Bacteria	Permanent Draft	Comparative genomics of human mucosal isolates of the enterotoxigenic Bacteroides fragilis group, etiologic agents of inflammatory diarrheal disease.	Parabacteroides distasonis 3999B T(B) 4	University of Maryland School of Medicine	2588254085	Bacteroidetes	Bacteroidia	Bacteroidales	Porphyromonadaceae	Parabacteroides	Parabacteroides distasonis	1339344	Gs0000094	Gp0043053	Ga0058394	3999B T(B) 4	Yes	PRJNA206130	SAMN02370944				Isolate	Yes	Whole Genome Sequencing				Parabacteroides distasonis 3999B T(B) 4	Complete		5315679	4887	180	2	2384344	0.45	4745513	89.27	4745513	89.27	4800	98.22	87	1.78	12	7	3
2588254084	Bacteria	Permanent Draft	Comparative genomics of human mucosal isolates of the enterotoxigenic Bacteroides fragilis group, etiologic agents of inflammatory diarrheal disease.	Parabacteroides distasonis 3999B T(B) 6	University of Maryland School of Medicine	2588254084	Bacteroidetes	Bacteroidia	Bacteroidales	Porphyromonadaceae	Parabacteroides	Parabacteroides distasonis	1339345	Gs0000094	Gp0043054	Ga0058395	3999B T(B) 6	Yes	PRJNA206131	SAMN02370945				Isolate	Yes	Whole Genome Sequencing				Parabacteroides distasonis 3999B T(B) 6	Complete		5417090	5039	199	1	2436005	0.45	4838082	89.31	4838082	89.31	4949	98.21	90	1.79	13	7	5
640753039	Bacteria	Finished	Parabacteroides distasonis ATCC 8503	Parabacteroides distasonis ATCC 8503	Washington University in St. Louis	640753039	Bacteroidetes	Bacteroidia	Bacteroidales	Porphyromonadaceae	Parabacteroides	Parabacteroides distasonis	435591	Gs0019360	Gp0000125	Ga0029724	ATCC 8503	Yes	PRJNA13485	SAMN02604310	Free living		Rod-shaped	Isolate	Yes	Whole Genome Sequencing	Host, Intestinal tract	Homo sapiens		Parabacteroides distasonis ATCC 8503	Complete	454, Sanger	4811379	3975	1	1	2167987	0.45	4381562	91.07	4372723	90.88	3861	97.13	114	2.87	21	7	7
2534682209	Bacteria	Permanent Draft	Human Microbiome Project (HMP) Reference Genomes	Parabacteroides distasonis CL03T12C09	Broad Institute	2534682209	Bacteroidetes	Bacteroidia	Bacteroidales	Porphyromonadaceae	Parabacteroides	Parabacteroides distasonis	999416	Gs0016050	Gp0010504	Ga0015657	CL03T12C09	Yes	PRJNA64883	SAMN02463937				Isolate	Yes	Whole Genome Sequencing	Host	Homo sapiens		Parabacteroides distasonis CL03T12C09	Complete	Illumina	5055863	4324	23	2	2281788	0.45	4606378	91.11	4606378	91.11	4224	97.69	100	2.31	18	6	5
2534682208	Bacteria	Permanent Draft	Human Microbiome Project (HMP) Reference Genomes	Parabacteroides distasonis CL09T03C24	Broad Institute	2534682208	Bacteroidetes	Bacteroidia	Bacteroidales	Porphyromonadaceae	Parabacteroides	Parabacteroides distasonis	999417	Gs0016050	Gp0010466	Ga0015656	CL09T03C24	Yes	PRJNA64885	SAMN02463938				Isolate	Yes	Whole Genome Sequencing	Host	Homo sapiens		Parabacteroides distasonis CL09T03C24	Complete	Illumina	5323016	4592	52	0	2393013	0.45	4838931	90.91	4838931	90.91	4495	97.89	97	2.11	22	9	5
2648501740	Bacteria	Permanent Draft	Parabacteroides goldsteinii strain:910340 genome sequencing	Parabacteroides goldsteinii 910340	Odense University Hospital	2648501740	Bacteroidetes	Bacteroidia	Bacteroidales	Porphyromonadaceae	Parabacteroides	Parabacteroides goldsteinii	328812	Gs0116623	Gp0120945	Ga0081151	910340	Yes	PRJNA287498	SAMN03782530				Isolate	Yes	Whole Genome Sequencing				Parabacteroides goldsteinii 910340			6828516	5664	223	0	2967768	0.43	6193990	90.71	6193990	90.71	5582	98.55	82	1.45	10	6	3
2534682203	Bacteria	Permanent Draft	Human Microbiome Project (HMP) Reference Genomes	Parabacteroides goldsteinii CL02T12C30	Broad Institute	2534682203	Bacteroidetes	Bacteroidia	Bacteroidales	Porphyromonadaceae	Parabacteroides	Parabacteroides goldsteinii	999418	Gs0016050	Gp0010505	Ga0015651	CL02T12C30	Yes	PRJNA64887	SAMN02463939				Isolate	Yes	Whole Genome Sequencing	Host	Homo sapiens		Parabacteroides goldsteinii CL02T12C30	Complete	Illumina	6690360	5499	50	2	2910119	0.43	6067653	90.69	6067653	90.69	5406	98.31	93	1.69	18	6	6
2563367169	Bacteria	Permanent Draft	Parabacteroides goldsteinii dnLKV18	Parabacteroides goldsteinii dnLKV18	Broad Institute	2563367169	Bacteroidetes	Bacteroidia	Bacteroidales	Porphyromonadaceae	Parabacteroides	Parabacteroides goldsteinii	1235789	Gs0019361	Gp0025106	Ga0024753	dnLKV18	Yes	PRJNA175978	SAMN01730987				Isolate	Yes	Whole Genome Sequencing				Parabacteroides goldsteinii dnLKV18	Complete	Illumina	7066206	5752	33	0	3075560	0.44	6417287	90.82	6417287	90.82	5647	98.17	105	1.83	26	10	8
2619619296	Bacteria	Permanent Draft	Human Microbiome Project (HMP) Reference Genomes	Parabacteroides goldsteinii WAL 12034	Broad Institute	2619619296	Bacteroidetes	Bacteroidia	Bacteroidales	Porphyromonadaceae	Parabacteroides	Parabacteroides goldsteinii	328812	Gs0016050	Gp0021084	Ga0072340	DSM 19448	Yes	PRJNA170353	SAMN03383454	Free living		Rod-shaped	Isolate	Yes	Whole Genome Sequencing	Host, Human fecal, Human intestinal microflora	Homo sapiens	human	Parabacteroides goldsteinii WAL 12034			6453122	5096	33	0	2797611	0.43	5864318	90.88	5864318	90.88	5000	98.12	96	1.88	18	6	5
2524614557	Bacteria	Permanent Draft	Genomic Encyclopedia of Type Strains, Phase I: the one thousand microbial genomes (KMG-I) project	Parabacteroides gordonii MS-1, DSM 23371	DOE Joint Genome Institute (JGI)	2524614557	Bacteroidetes	Bacteroidia	Bacteroidales	Porphyromonadaceae	Parabacteroides	Parabacteroides gordonii	1203610	Gs0015051	Gp0013109	Ga0000355	MS-1	Yes	PRJNA182431	SAMN02440889			Rod-shaped	Isolate	Yes	Whole Genome Sequencing	Host, Human	Homo sapiens	Human blood culture	Parabacteroides gordonii MS-1, DSM 23371	Complete	Illumina, Illumina HiSeq 2000, Illumina HiSeq 2500	6679203	5421	55	3	2965927	0.44	6086936	91.18	6086936	91.18	5326	98.25	95	1.75	11	6	4
2619619297	Bacteria	Permanent Draft	Human Microbiome Project (HMP) Reference Genomes	Parabacteroides gordonii MS-1, DSM 23371	Broad Institute	2619619297	Bacteroidetes	Bacteroidia	Bacteroidales	Porphyromonadaceae	Parabacteroides	Parabacteroides gordonii	1203610	Gs0016050	Gp0020956	Ga0072341	MS-1	Yes	PRJNA170354	SAMN03383453			Rod-shaped	Isolate	Yes	Whole Genome Sequencing	Host, Human	Homo sapiens	Human blood culture	Parabacteroides gordonii MS-1, DSM 23371			6755772	5406	38	3	3001800	0.44	6155321	91.11	6155321	91.11	5304	98.11	102	1.89	15	6	5
2534682202	Bacteria	Permanent Draft	Human Microbiome Project (HMP) Reference Genomes	Parabacteroides johnsonii CL02T12C29	Broad Institute	2534682202	Bacteroidetes	Bacteroidia	Bacteroidales	Porphyromonadaceae	Parabacteroides	Parabacteroides johnsonii	999419	Gs0016050	Gp0010506	Ga0015650	CL02T12C29	Yes	PRJNA64889	SAMN02463940				Isolate	Yes	Whole Genome Sequencing	Host	Homo sapiens		Parabacteroides johnsonii CL02T12C29	Complete	Illumina	4613502	3841	37	0	2082046	0.45	4173974	90.47	4173974	90.47	3758	97.84	83	2.16	12	4	4
642979358	Bacteria	Permanent Draft	Human Microbiome Project (HMP) Reference Genomes	Parabacteroides johnsonii DSM 18315	Washington University in St. Louis	642979358	Bacteroidetes	Bacteroidia	Bacteroidales	Porphyromonadaceae	Parabacteroides	Parabacteroides johnsonii	537006	Gs0016050	Gp0003804	Ga0029725	M-165, DSM 18315	Yes	PRJNA30007	SAMN00008846	Free living		Rod-shaped	Isolate	Yes	Whole Genome Sequencing	Feces, Gastrointestinal tract, Host, Human fecal, Human intestinal microflora	Homo sapiens	human faeces	Parabacteroides johnsonii DSM 18315	Complete	454-GS-FLX, Sanger	4612238	4577	527	1	2084835	0.45	4246821	92.08	4246821	92.08	4515	98.65	62	1.35	3	1	1
640963016	Bacteria	Permanent Draft	Human Microbiome Project (HMP) Reference Genomes	Parabacteroides merdae ATCC 43184	Washington University in St. Louis	640963016	Bacteroidetes	Bacteroidia	Bacteroidales	Porphyromonadaceae	Parabacteroides	Parabacteroides merdae	411477	Gs0016050	Gp0000891	Ga0029726	ATCC 43184	Yes	PRJNA18193	SAMN00627057	Free living		Rod-shaped	Isolate	Yes	Whole Genome Sequencing	Host, Human fecal, Human intestinal microflora	Homo sapiens	Human fecal sample collected in Texas	Parabacteroides merdae ATCC 43184	Complete	454-GS20, Sanger	4431877	4471	118	2	2007793	0.45	4027024	90.86	4027024	90.86	4384	98.05	87	1.95	12	7	3
2529293058	Bacteria	Permanent Draft	Human Microbiome Project (HMP) Reference Genomes	Parabacteroides merdae CL03T12C32	Broad Institute	2529293058	Bacteroidetes	Bacteroidia	Bacteroidales	Porphyromonadaceae	Parabacteroides	Parabacteroides merdae	999420	Gs0016050	Gp0010467	Ga0014099	CL03T12C32	Yes	PRJNA64891	SAMN02463941				Isolate	Yes	Whole Genome Sequencing	Host	Homo sapiens		Parabacteroides merdae CL03T12C32	Complete	Illumina	4918045	4248	37	0	2225491	0.45	4435614	90.19	4435614	90.19	4134	97.32	114	2.68	30	10	10
2534681605	Bacteria	Permanent Draft	Human Microbiome Project (HMP) Reference Genomes	Parabacteroides merdae CL09T00C40	Broad Institute	2534681605	Bacteroidetes	Bacteroidia	Bacteroidales	Porphyromonadaceae	Parabacteroides	Parabacteroides merdae	999421	Gs0016050	Gp0010507	Ga0015056	CL09T00C40	Yes	PRJNA64893	SAMN02463942				Isolate	Yes	Whole Genome Sequencing	Host	Homo sapiens		Parabacteroides merdae CL09T00C40	Complete	Illumina	4448563	3808	38	3	2013028	0.45	4005961	90.05	4005961	90.05	3703	97.24	105	2.76	21	5	8
645058782	Bacteria	Permanent Draft	Human Microbiome Project (HMP) Reference Genomes	Parabacteroides sp. 2_1_7	Broad Institute	645058782	Bacteroidetes	Bacteroidia	Bacteroidales	Porphyromonadaceae	Parabacteroides	Parabacteroides sp. 2_1_7	457388	Gs0016050	Gp0003258	Ga0027770	2_1_7	Yes	PRJNA32437	SAMN02463691	Free living		Rod-shaped	Isolate	Yes	Whole Genome Sequencing	Host, Human fecal, Human intestinal microflora	Homo sapiens	Human fecal sample	Parabacteroides sp. 2_1_7	Complete		5137215	4443	106	0	2315977	0.45	4621598	89.96	4621598	89.96	4372	98.4	71	1.6	5	2	1
2563367164	Bacteria	Permanent Draft	Parabacteroides sp. ASF519	Parabacteroides sp. ASF519	Broad Institute	2563367164	Bacteroidetes	Bacteroidia	Bacteroidales	Porphyromonadaceae	Parabacteroides	Parabacteroides sp. ASF519	1235803	Gs0019362	Gp0025149	Ga0024748	ASF519	Yes	PRJNA176004	SAMN01731008				Isolate	Yes	Whole Genome Sequencing		Mus musculus	Mouse Cecum	Parabacteroides sp. ASF519	Complete	Illumina	6862324	5536	24	0	2981872	0.43	6233263	90.83	6233263	90.83	5447	98.39	89	1.61	16	6	5
2517572002	Bacteria	Draft	ASF519	Parabacteroides sp. ASF519 (ASF519)	Broad Institute	2517572002	Bacteroidetes	Bacteroidia	Bacteroidales	Porphyromonadaceae	Parabacteroides	Parabacteroides sp. ASF519	1235803	Gs0001351	Gp0025996	Ga0011450	ASF519	Yes						Isolate	Yes	Whole Genome Sequencing		Mus musculus	Mouse Cecum	Parabacteroides sp. ASF519	In progress	454	6720692	5712	416	0	2919233	0.43	6120768	91.07	6120768	91.07	5632	98.6	80	1.4	3	1	1
646206279	Bacteria	Permanent Draft	Human Microbiome Project (HMP) Reference Genomes	Parabacteroides sp. D13	Broad Institute	646206279	Bacteroidetes	Bacteroidia	Bacteroidales	Porphyromonadaceae	Parabacteroides	Parabacteroides sp. D13	563193	Gs0016050	Gp0004628	Ga0029727	D13	Yes	PRJNA38359	SAMN02463739	Free living		Rod-shaped	Isolate	Yes	Whole Genome Sequencing	Feces, Gastrointestinal tract, Host, Human fecal, Human intestinal microflora	Homo sapiens	Human feces	Parabacteroides sp. D13	Complete	454-GS-FLX, Sanger	5370710	4562	22	1	2406733	0.45	4832930	90.72	4832930	90.72	4494	98.51	68	1.49	4	1	1
2636415718	Bacteria	Permanent Draft	Human Microbiome Project (HMP) Reference Genomes	Parabacteroides sp. D26	Broad Institute	2636415718	Bacteroidetes	Bacteroidia	Bacteroidales	Porphyromonadaceae	Parabacteroides	Parabacteroides sp. D26	658662	Gs0016050	Gp0005628	Ga0081888	D26	Yes	PRJNA39407	SAMN00103310	Free living		Rod-shaped	Isolate	Yes	Whole Genome Sequencing	Feces, Gastrointestinal tract, Host, Human fecal, Human intestinal microflora	Homo sapiens	Human feces	Parabacteroides sp. D26		454-GS-FLX, Sanger	5117067	4482	92	3	2314812	0.45	4646071	90.8	4646071	90.8	4368	97.46	114	2.54	24	7	7
2619619295	Bacteria	Permanent Draft	Human Microbiome Project (HMP) Reference Genomes	Parabacteroides sp. HGS0025	Broad Institute	2619619295	Bacteroidetes	Bacteroidia	Bacteroidales	Porphyromonadaceae	Parabacteroides	Parabacteroides sp. HGS0025	1078087	Gs0016050	Gp0012193	Ga0072337	HGS0025	Yes	PRJNA72493	SAMN03383452				Isolate	Yes	Whole Genome Sequencing		Homo sapiens		Parabacteroides sp. HGS0025			6741337	5312	18	5	2987201	0.44	6155757	91.31	6155757	91.31	5219	98.25	93	1.75	19	6	6
2630968832	Bacteria	Permanent Draft	Ruminococcaceae bacterium 585-1 Genome sequencing	Ruminococcaceae bacterium 585-1	Pirogov Russian National Research Medical University	2630968832	Firmicutes	Clostridia	Clostridiales	Ruminococcaceae	unclassified	Ruminococcaceae bacterium 585-1	1550024	Gs0115746	Gp0118232	Ga0077737	585-1	Yes	PRJNA274229	SAMN03323960				Isolate	Yes	Whole Genome Sequencing				Ruminococcaceae bacterium 585-1			4111078	3990	108	1	2323370	0.57	3592832	87.39	3592832	87.39	3926	98.4	64	1.6	3	1	1
2558860118	Bacteria	Permanent Draft	The Hungate 1000. A catalogue of reference genomes from the rumen microbiome.	Ruminococcaceae bacterium AB4001	DOE Joint Genome Institute (JGI)	2558860118	Firmicutes	Clostridia	Clostridiales	Ruminococcaceae	unclassified	Ruminococcaceae bacterium AB4001	1410638	Gs0033970	Gp0047074	Ga0005590	AB4001	Yes	PRJNA223440	SAMN02744006				Isolate	Yes	Whole Genome Sequencing				Ruminococcaceae bacterium AB4001	Complete	Illumina HiSeq 2000, Illumina HiSeq 2500	3248062	2868	54	3	1482841	0.46	2973118	91.55	2973118	91.55	2797	97.52	71	2.48	8	2	2
2558309033	Bacteria	Permanent Draft	The Hungate 1000. A catalogue of reference genomes from the rumen microbiome.	Ruminococcaceae bacterium AE2021	DOE Joint Genome Institute (JGI)	2558309033	Firmicutes	Clostridia	Clostridiales	Ruminococcaceae	unclassified	Ruminococcaceae bacterium AE2021	1392491	Gs0033970	Gp0036662	Ga0004249	AE2021	Yes	PRJNA217189	SAMN02743907				Isolate	Yes	Whole Genome Sequencing			cow rumen	Ruminococcaceae bacterium AE2021	Complete	Illumina HiSeq 2000, Illumina HiSeq 2500, PacBio RS	3083950	2914	1	0	1426351	0.46	2862879	92.83	2849819	92.41	2852	97.87	62	2.13	6	2	2
2639762831	Bacteria	Permanent Draft	Soleaferrea massiliensis genome sequence	Ruminococcaceae bacterium AP7	European Bioinformatics Institute	2639762831	Firmicutes	Clostridia	Clostridiales	Ruminococcaceae	Candidatus Soleaferrea	Candidatus Soleaferrea massiliensis	1211843	Gs0032531	Gp0036934	Ga0069224	AP7	Yes	PRJEB375	SAMEA2821497				Isolate	Yes	Whole Genome Sequencing				Ruminococcaceae bacterium AP7			3098593	2472	51	5	1647157	0.53	2513819	81.13	2513819	81.13	2417	97.78	55	2.22	3	1	1
2667527889	Bacteria	Permanent Draft	Genome sequencing of the human gut microbiota	Ruminococcaceae bacterium cv2	Research Unit on Emerging Infectious and Tropical Diseases ( URMITE )	2667527889	Firmicutes	Clostridia	Clostridiales	Ruminococcaceae	unclassified	Ruminococcaceae bacterium cv2	1627893	Gs0118334	Gp0132582	Ga0112032	cv2	Yes	PRJEB10306	SAMEA3528423				Isolate	Yes	Whole Genome Sequencing				Ruminococcaceae bacterium cv2			4247067	4159	67	1	2394657	0.56	3687935	86.84	3687935	86.84	4092	98.39	67	1.61	5	3	1
2562617183	Bacteria	Permanent Draft	Human Microbiome Project (HMP) Reference Genomes	Ruminococcaceae bacterium D16	Broad Institute	2562617183	Firmicutes	Clostridia	Clostridiales	Ruminococcaceae	unclassified	Ruminococcaceae bacterium D16	552398	Gs0016050	Gp0004678	Ga0024136	D16	Yes	PRJNA42541	SAMN02463841	Free living			Isolate	Yes	Whole Genome Sequencing	Host	Homo sapiens	healthy biopsy tissue from a 57 year old male	Ruminococcaceae bacterium D16	Complete	454	3197155	3084	8	0	1815989	0.57	2841065	88.86	2787010	87.17	3027	98.15	57	1.85	4	3	1
2593339255	Bacteria	Draft	The Hungate 1000. A catalogue of reference genomes from the rumen microbiome.	Ruminococcaceae bacterium D5	DOE Joint Genome Institute (JGI)	2593339255	Firmicutes	Clostridia	Clostridiales	Ruminococcaceae	unclassified	Ruminococcaceae bacterium D5	1520815	Gs0033970	Gp0088024	Ga0007613	D5	Yes	PRJNA254865	SAMN02910435				Isolate	Yes	Whole Genome Sequencing			deer rumen	Ruminococcaceae bacterium D5	Complete	Illumina HiSeq 2000, Illumina HiSeq 2500	2636013	2556	49	2	1496832	0.57	2236017	84.94	2236017	84.94	2501	97.85	55	2.15	4	1	2
2596583597	Bacteria	Draft	The Hungate 1000. A catalogue of reference genomes from the rumen microbiome.	Ruminococcaceae bacterium FB2012	DOE Joint Genome Institute (JGI)	2596583597	Firmicutes	Clostridia	Clostridiales	Ruminococcaceae	unclassified	Ruminococcaceae bacterium FB2012	1520817	Gs0033970	Gp0088025	Ga0007574	FB2012	Yes	PRJNA254870	SAMN02910317				Isolate	Yes	Whole Genome Sequencing			cow rumen	Ruminococcaceae bacterium FB2012	In progress	Illumina HiSeq 2000, Illumina HiSeq 2500	3758243	3286	52	3	1920104	0.51	3311449	88.12	3311449	88.12	3210	97.69	76	2.31	9	2	3
2654588206	Bacteria	Draft	The Hungate 1000. A catalogue of reference genomes from the rumen microbiome.	Ruminococcaceae bacterium KH2T8	DOE Joint Genome Institute (JGI)	2654588206	Firmicutes	Clostridia	Clostridiales	Ruminococcaceae	unclassified	Ruminococcaceae bacterium KH2T8	541000	Gs0033970	Gp0128376	Ga0105819	KH2T8	Yes	PRJNA322937	SAMN05216413				Isolate	Yes	Whole Genome Sequencing			cow rumen	Ruminococcaceae bacterium KH2T8		Illumina HiSeq 2500-1TB	2915584	2666	9	2	1366225	0.47	2691569	92.34	2683177	92.05	2611	97.94	55	2.06	6	2	2
2606217800	Bacteria	Draft	The Hungate 1000. A catalogue of reference genomes from the rumen microbiome.	Ruminococcaceae bacterium KHP2	DOE Joint Genome Institute (JGI)	2606217800	Firmicutes	Clostridia	Clostridiales	Ruminococcaceae	unclassified	unclassified	541000	Gs0033970	Gp0104832	Ga0059115	KHP2	Yes						Isolate	Yes	Whole Genome Sequencing			cow rumen	Ruminococcaceae bacterium KHP2	Awaiting Sample	Illumina HiSeq 2500-1TB	2977599	2814	20	0	1381616	0.46	2763831	92.82	2760026	92.69	2756	97.94	58	2.06	7	2	3
2545555870	Bacteria	Draft	Cuf	Ruminococcaceae bacterium LM158 (velvet+gapcloser)	California Institute of Technology	2545555870	Firmicutes	Clostridia	Clostridiales	Ruminococcaceae	unclassified	Ruminococcaceae bacterium LM158	1508482	Gs0011874	Gp0050906	Ga0018021	LM158	Yes					Rod-shaped	Isolate	Yes	Whole Genome Sequencing	Human intestinal microflora	Homo sapiens	Chicago	Ruminococcaceae bacterium LM158	Complete	Illumina HiSeq 2000	3418856	3578	83	1	1908225	0.56	2997499	87.69	2997499	87.69	3482	97.32	96	2.68	16	5	7
2593339217	Bacteria	Draft	The Hungate 1000. A catalogue of reference genomes from the rumen microbiome.	Ruminococcaceae bacterium P7	DOE Joint Genome Institute (JGI)	2593339217	Firmicutes	Clostridia	Clostridiales	Ruminococcaceae	unclassified	Ruminococcaceae bacterium P7	1200751	Gs0033970	Gp0088026	Ga0007618	P7	Yes	PRJNA254869	SAMN02910436				Isolate	Yes	Whole Genome Sequencing			cow rumen	Ruminococcaceae bacterium P7	Complete	Illumina HiSeq 2000, Illumina HiSeq 2500	3059420	2961	87	4	1534312	0.5	2687432	88.09	2687432	88.09	2887	97.5	74	2.5	13	5	4
2623621023	Bacteria	Draft	The Hungate 1000. A catalogue of reference genomes from the rumen microbiome.	Ruminococcaceae bacterium R-25	DOE Joint Genome Institute (JGI)	2623621023	Firmicutes	Clostridia	Clostridiales	Ruminococcaceae	unclassified	unclassified	541000	Gs0033970	Gp0110683	Ga0066889	R-25	Yes						Isolate	Yes	Whole Genome Sequencing			sheep rumen	Ruminococcaceae bacterium R-25		Illumina HiSeq 2500-1TB	3067561	2782	7	3	1375500	0.45	2809805	91.6	2803841	91.4	2729	98.09	53	1.91	6	2	2
2593339208	Bacteria	Draft	The Hungate 1000. A catalogue of reference genomes from the rumen microbiome.	Ruminococcaceae bacterium YAD3003	DOE Joint Genome Institute (JGI)	2593339208	Firmicutes	Clostridia	Clostridiales	Ruminococcaceae	unclassified	Ruminococcaceae bacterium YAD3003	1520816	Gs0033970	Gp0088027	Ga0007585	YAD3003	Yes	PRJNA254868	SAMN02910264				Isolate	Yes	Whole Genome Sequencing			cow rumen	Ruminococcaceae bacterium YAD3003	Complete	Illumina HiSeq 2000, Illumina HiSeq 2500	2673997	2411	30	1	1167191	0.44	2457179	91.89	2457179	91.89	2344	97.22	67	2.78	7	2	2
2593339241	Bacteria	Draft	The Hungate 1000. A catalogue of reference genomes from the rumen microbiome.	Ruminococcaceae bacterium YRB3002	DOE Joint Genome Institute (JGI)	2593339241	Firmicutes	Clostridia	Clostridiales	Ruminococcaceae	unclassified	Ruminococcaceae bacterium YRB3002	1520819	Gs0033970	Gp0095034	Ga0041857	YRB3002	Yes	PRJNA254887	SAMN02910456				Isolate	Yes	Whole Genome Sequencing			cow rumen	Ruminococcaceae bacterium YRB3002	Complete	Illumina HiSeq 2000, Illumina HiSeq 2500	3010384	2733	51	1	1438241	0.48	2742728	91.21	2742728	91.21	2652	97.04	81	2.96	6	2	3
2590828841	Bacteria	Finished	Clostridium isolates from termite (Nasutitermes exitiosus) gut enrichment culture	Ruminococcaceae sp. Ne3 (Draft 3)	Macrogen	2590828841	Firmicutes	Clostridia	Clostridiales	Clostridiaceae	Clostridium	Clostridium sp. 3	1485	Gs0113056	Gp0104096	Ga0059398	3	Yes						Isolate	Yes	Whole Genome Sequencing	Termite gut	Nasutitermes exitiosus soldiers	CSIRO Animal Food and Health Science	Ruminococcaceae sp. Ne3	Complete	Illumina HiSeq 2000	2676222	2632	267	0	1443082	0.54	2308641	86.26	2308641	86.26	2596	98.63	36	1.37	0	0	0
649633094	Bacteria	Finished	Novel Microbial Enzymes	Ruminococcus albus 7	DOE Joint Genome Institute (JGI)	649633094	Firmicutes	Clostridia	Clostridiales	Ruminococcaceae	Ruminococcus	Ruminococcus albus	697329	Gs0018994	Gp0006447	Ga0030179	7	Yes	PRJNA42255	SAMN00016988	Free living		Coccus-shaped	Isolate	Yes	Whole Genome Sequencing	Bovine, Bovine rumen, Host		Bovine rumen	Ruminococcus albus 7	Complete	454, Illumina	4482087	4103	5	4	1954876	0.44	3899342	87	3783614	84.42	4014	97.83	89	2.17	12	4	4
2562617137	Bacteria	Permanent Draft	Ruminococcus albus 8	Ruminococcus albus 8	J. Craig Venter Institute (JCVI)	2562617137	Firmicutes	Clostridia	Clostridiales	Ruminococcaceae	Ruminococcus	Ruminococcus albus	246199	Gs0030955	Gp0001838	Ga0024091	8	Yes	PRJNA62	SAMN02436640	Free living		Coccus-shaped	Isolate	Yes	Whole Genome Sequencing	Host	Bos taurus	rumen from dairy cow	Ruminococcus albus 8	Complete	454	4052160	3898	136	4	1888117	0.47	3440104	84.9	3439624	84.88	3834	98.36	64	1.64	5	3	1
2540341206	Bacteria	Permanent Draft	The Hungate 1000. A catalogue of reference genomes from the rumen microbiome.	Ruminococcus albus AD2013	DOE Joint Genome Institute (JGI)	2540341206	Firmicutes	Clostridia	Clostridiales	Ruminococcaceae	Ruminococcus	Ruminococcus albus	1384065	Gs0033970	Gp0036633	Ga0004241	AD2013	Yes	PRJNA214529	SAMN02584992				Isolate	Yes	Whole Genome Sequencing			cow rumen	Ruminococcus albus AD2013	Complete	Illumina HiSeq 2000, Illumina HiSeq 2500, PacBio RS	4234989	3800	6	1	1865524	0.44	3653477	86.27	3578441	84.5	3693	97.18	107	2.82	12	4	4
2593339152	Bacteria	Draft	The Hungate 1000. A catalogue of reference genomes from the rumen microbiome.	Ruminococcus albus AR67	DOE Joint Genome Institute (JGI)	2593339152	Firmicutes	Clostridia	Clostridiales	Ruminococcaceae	Ruminococcus	Ruminococcus albus	1264	Gs0033970	Gp0088029	Ga0007600	AR67	Yes	PRJNA254872	SAMN02910406				Isolate	Yes	Whole Genome Sequencing			sheep rumen	Ruminococcus albus AR67	Complete	Illumina HiSeq 2000, Illumina HiSeq 2500	4276527	3887	103	5	1916548	0.45	3682761	86.19	3682761	86.19	3812	98.07	75	1.93	7	3	1
2558860976	Bacteria	Permanent Draft	Genomic Encyclopedia of Type Strains, Phase I: the one thousand microbial genomes (KMG-I) project	Ruminococcus albus DSM 20455	DOE Joint Genome Institute (JGI)	2558860976	Firmicutes	Clostridia	Clostridiales	Ruminococcaceae	Ruminococcus	Ruminococcus albus	697329	Gs0015051	Gp0013235	Ga0002140	7	Yes	PRJNA221059	SAMN02743985	Free living		Coccus-shaped	Isolate	Yes	Whole Genome Sequencing	Bovine, Bovine rumen, Host		Bovine rumen	Ruminococcus albus DSM 20455	Complete	Illumina, Illumina HiSeq 2000, Illumina HiSeq 2500	4332295	4026	120	2	1887118	0.44	3748497	86.64	3748497	86.64	3957	98.29	69	1.71	4	2	1
2651870358	Bacteria	Draft	The Hungate 1000. A catalogue of reference genomes from the rumen microbiome.	Ruminococcus albus KH2T6	DOE Joint Genome Institute (JGI)	2651870358	Firmicutes	Clostridia	Clostridiales	Ruminococcaceae	Ruminococcus	Ruminococcus albus	1264	Gs0033970	Gp0127413	Ga0104370	KH2T6	Yes	PRJNA322971	SAMN05216469				Isolate	Yes	Whole Genome Sequencing			cow rumen	Ruminococcus albus KH2T6		Illumina HiSeq 2500-1TB	3845245	3513	47	6	1737719	0.45	3316497	86.31	3316497	86.31	3432	97.69	81	2.31	5	2	2
2576861727	Bacteria	Permanent Draft	Ruminococcus albus SY3	Ruminococcus albus SY3	Weizmann Institute of Science	2576861727	Firmicutes	Clostridia	Clostridiales	Ruminococcaceae	Ruminococcus	Ruminococcus albus	1341156	Gs0108451	Gp0087605	Ga0049711	SY3	Yes	PRJNA206423	SAMN02951913				Isolate	Yes	Whole Genome Sequencing				Ruminococcus albus SY3	Complete	454, Illumina	4286476	3790	4	14	1881218	0.45	3619455	85.86	3571471	84.72	3706	97.78	84	2.22	3	1	1
650377966	Bacteria	Finished	Human Microbiome Project (HMP) Reference Genomes	Ruminococcus bromii L2-63	Wellcome Trust Sanger Institute	650377966	Firmicutes	Clostridia	Clostridiales	Ruminococcaceae	Ruminococcus	Ruminococcus bromii	40518	Gs0016050	Gp0004253	Ga0030180	L2-63	Yes	PRJNA39153		Free living		Coccus-shaped	Isolate	Yes	Whole Genome Sequencing	Feces, Gastrointestinal tract, Host, Human fecal, Human intestinal microflora	Homo sapiens	Human feces from Rowett Research Institute, Aberdeen	Ruminococcus bromii L2-63	Complete	454-GS-FLX-Titanium	2249085	1852	1	0	923349	0.41	1661422	74.47	1661422	74.47	1811	97.79	41	2.21	3	1	1
2593339225	Bacteria	Draft	The Hungate 1000. A catalogue of reference genomes from the rumen microbiome.	Ruminococcus bromii YE282	DOE Joint Genome Institute (JGI)	2593339225	Firmicutes	Clostridia	Clostridiales	Ruminococcaceae	Ruminococcus	Ruminococcus bromii	40518	Gs0033970	Gp0088030	Ga0007602	YE282	Yes	PRJNA254871	SAMN02910441				Isolate	Yes	Whole Genome Sequencing			cow rumen	Ruminococcus bromii YE282	Complete	Illumina HiSeq 2000, Illumina HiSeq 2500	2539482	2571	81	1	994038	0.39	2233858	87.97	2233858	87.97	2491	96.89	80	3.11	11	4	3
2597490297	Bacteria	Permanent Draft	Human Microbiome Project (HMP) Reference Genomes	Ruminococcus callidus ATCC 27760	Washington University in St. Louis	2597490297	Firmicutes	Clostridia	Clostridiales	Ruminococcaceae	Ruminococcus	Ruminococcus callidus	411473	Gs0016050	Gp0000917	Ga0038533	ATCC 27760	Yes	PRJNA18185	SAMN00627105	Free living		Coccus-shaped	Isolate	Yes	Whole Genome Sequencing	Feces, Gastrointestinal tract, Host, Human intestinal microflora	Homo sapiens	Human feces	Ruminococcus callidus ATCC 27760	Draft	454, Sanger	3070687	2913	484	30	1507111	0.49	2663607	86.74	2663607	86.74	2849	97.8	64	2.2	3	1	1
2571042740	Bacteria	Permanent Draft	Ruminococcus flavefaciens 007c Genome sequencing	Ruminococcus flavefaciens 007c	Weizmann Institute of Science	2571042740	Firmicutes	Clostridia	Clostridiales	Ruminococcaceae	Ruminococcus	Ruminococcus flavefaciens	1341157	Gs0030956	Gp0043132	Ga0042148	007c	Yes	PRJNA206425	SAMN02952951				Isolate	Yes	Whole Genome Sequencing		Bos taurus		Ruminococcus flavefaciens 007c	Complete	454	3649758	3260	39	1	1660019	0.45	3227262	88.42	3186971	87.32	3212	98.53	48	1.47	4	1	1
2547132412	Bacteria	Permanent Draft	Ruminococcus flavefaciens 17	Ruminococcus flavefaciens 17	University of Illinois, Urbana-Champaign	2547132412	Firmicutes	Clostridia	Clostridiales	Ruminococcaceae	Ruminococcus	Ruminococcus flavefaciens	1030842	Gs0030957	Gp0011637	Ga0019906	17	Yes	PRJNA66749	SAMN02471822				Isolate	Yes	Whole Genome Sequencing				Ruminococcus flavefaciens 17	Complete	454, Illumina GAiix	3454940	3534	489	0	1552148	0.45	3073540	88.96	3073540	88.96	3477	98.39	57	1.61	3	1	1
2540341248	Bacteria	Permanent Draft	The Hungate 1000. A catalogue of reference genomes from the rumen microbiome.	Ruminococcus flavefaciens AE3010	DOE Joint Genome Institute (JGI)	2540341248	Firmicutes	Clostridia	Clostridiales	Ruminococcaceae	Ruminococcus	Ruminococcus flavefaciens	1384066	Gs0033970	Gp0036582	Ga0004231	AE3010	Yes	PRJNA214530	SAMN02584993				Isolate	Yes	Whole Genome Sequencing			cow rumen	Ruminococcus flavefaciens AE3010	Complete	Illumina HiSeq 2000, Illumina HiSeq 2500, PacBio RS	3705946	3212	3	4	1702743	0.46	3283234	88.59	3214941	86.75	3136	97.63	76	2.37	12	4	4
2546825524	Bacteria	Permanent Draft	Genomic Encyclopedia of Type Strains, Phase I: the one thousand microbial genomes (KMG-I) project	Ruminococcus flavefaciens ATCC 19208	DOE Joint Genome Institute (JGI)	2546825524	Firmicutes	Clostridia	Clostridiales	Ruminococcaceae	Ruminococcus	Ruminococcus flavefaciens	1336236	Gs0015051	Gp0032043	Ga0002629	ATCC 19208	Yes	PRJNA204092	SAMN02584965				Isolate	Yes	Whole Genome Sequencing			Rumen	Ruminococcus flavefaciens ATCC 19208	Complete	Illumina HiSeq 2000, Illumina HiSeq 2500	3587803	3159	25	0	1546393	0.43	3177733	88.73	3177733	88.73	3094	97.94	65	2.06	7	3	1
645951829	Bacteria	Permanent Draft	Novel Microbial Enzymes	Ruminococcus flavefaciens FD-1	University of Illinois	645951829	Firmicutes	Clostridia	Clostridiales	Ruminococcaceae	Ruminococcus	Ruminococcus flavefaciens	641112	Gs0040088	Gp0001839	Ga0030181	FD-1	Yes	PRJNA37767	SAMN02471821	Free living		Coccus-shaped	Isolate	Yes	Whole Genome Sequencing	Host	Bos taurus	rumen pill of cattle	Ruminococcus flavefaciens FD-1	Complete	454, Sanger	4573608	4226	119	2	2058956	0.45	3928444	85.9	3928444	85.9	4162	98.49	64	1.51	8	4	3
2558309013	Bacteria	Permanent Draft	The Hungate 1000. A catalogue of reference genomes from the rumen microbiome.	Ruminococcus flavefaciens MA2007	DOE Joint Genome Institute (JGI)	2558309013	Firmicutes	Clostridia	Clostridiales	Ruminococcaceae	Ruminococcus	Ruminococcus flavefaciens	1410670	Gs0033970	Gp0047075	Ga0005574	MA2007	Yes	PRJNA223451	SAMN02744016				Isolate	Yes	Whole Genome Sequencing				Ruminococcus flavefaciens MA2007	Complete	Illumina HiSeq 2000, Illumina HiSeq 2500	3395317	2977	29	0	1556449	0.46	2986793	88.01	2986793	88.01	2907	97.65	70	2.35	11	4	4
2562617051	Bacteria	Permanent Draft	The Hungate 1000. A catalogue of reference genomes from the rumen microbiome.	Ruminococcus flavefaciens MC2020	DOE Joint Genome Institute (JGI)	2562617051	Firmicutes	Clostridia	Clostridiales	Ruminococcaceae	Ruminococcus	Ruminococcus flavefaciens	1410671	Gs0033970	Gp0047076	Ga0005575	MC2020	Yes	PRJNA223444	SAMN02841181				Isolate	Yes	Whole Genome Sequencing				Ruminococcus flavefaciens MC2020	Complete	Illumina HiSeq 2000, Illumina HiSeq 2500	3125163	2761	16	0	1621610	0.52	2759799	88.37	2734792	87.56	2689	97.39	72	2.61	13	4	5
2558309005	Bacteria	Permanent Draft	The Hungate 1000. A catalogue of reference genomes from the rumen microbiome.	Ruminococcus flavefaciens ND2009	DOE Joint Genome Institute (JGI)	2558309005	Firmicutes	Clostridia	Clostridiales	Ruminococcaceae	Ruminococcus	Ruminococcus flavefaciens	1410672	Gs0033970	Gp0047077	Ga0005586	ND2009	Yes	PRJNA223442	SAMN02744011				Isolate	Yes	Whole Genome Sequencing				Ruminococcus flavefaciens ND2009	Complete	Illumina HiSeq 2000, Illumina HiSeq 2500	3636694	3209	33	1	1746582	0.48	3247318	89.41	3247318	89.41	3137	97.76	72	2.24	11	4	4
2593339138	Bacteria	Draft	The Hungate 1000. A catalogue of reference genomes from the rumen microbiome.	Ruminococcus flavefaciens SAb67	DOE Joint Genome Institute (JGI)	2593339138	Firmicutes	Clostridia	Clostridiales	Ruminococcaceae	Ruminococcus	Ruminococcus flavefaciens	1265	Gs0033970	Gp0088031	Ga0007627	SAb67	Yes	PRJNA254877	SAMN02910325				Isolate	Yes	Whole Genome Sequencing			sheep abomasum	Ruminococcus flavefaciens SAb67	Complete	Illumina HiSeq 2000, Illumina HiSeq 2500	3832489	3461	28	4	1806588	0.47	3407544	89.03	3407544	89.03	3384	97.78	77	2.22	15	4	5
2606217757	Bacteria	Draft	The Hungate 1000. A catalogue of reference genomes from the rumen microbiome.	Ruminococcus flavefaciens XPD3002	DOE Joint Genome Institute (JGI)	2606217757	Firmicutes	Clostridia	Clostridiales	Ruminococcaceae	Ruminococcus	Ruminococcus flavefaciens	1265	Gs0033970	Gp0104833	Ga0059109	XPD3002	Yes	PRJNA303263	SAMN04487832				Isolate	Yes	Whole Genome Sequencing			cow rumen	Ruminococcus flavefaciens XPD3002	Awaiting Sample	Illumina HiSeq 2500-1TB	3642793	3245	41	14	1627427	0.45	3201110	88.01	3201110	88.01	3181	98.03	64	1.97	11	3	4
2623620473	Bacteria	Draft	The Hungate 1000. A catalogue of reference genomes from the rumen microbiome.	Ruminococcus flavefaciens Y1	DOE Joint Genome Institute (JGI)	2623620473	Firmicutes	Clostridia	Clostridiales	Ruminococcaceae	Ruminococcus	Ruminococcus flavefaciens	1265	Gs0033970	Gp0110684	Ga0066885	Y1	Yes	PRJNA303327	SAMN04487860				Isolate	Yes	Whole Genome Sequencing			sheep rumen	Ruminococcus flavefaciens Y1		Illumina HiSeq 2500-1TB	3678787	3272	33	1	1592848	0.43	3256930	88.62	3256930	88.62	3199	97.77	73	2.23	13	4	3
2593339145	Bacteria	Draft	The Hungate 1000. A catalogue of reference genomes from the rumen microbiome.	Ruminococcus flavefaciens YAD2003	DOE Joint Genome Institute (JGI)	2593339145	Firmicutes	Clostridia	Clostridiales	Ruminococcaceae	Ruminococcus	Ruminococcus flavefaciens	1265	Gs0033970	Gp0088032	Ga0007577	YAD2003	Yes	PRJNA254875	SAMN02910265				Isolate	Yes	Whole Genome Sequencing			cow rumen	Ruminococcus flavefaciens YAD2003	Complete	Illumina HiSeq 2000, Illumina HiSeq 2500	3663705	3200	32	1	1580226	0.43	3227582	88.23	3227582	88.23	3141	98.16	59	1.84	12	4	4
2593339237	Bacteria	Draft	The Hungate 1000. A catalogue of reference genomes from the rumen microbiome.	Ruminococcus flavefaciens YL228	DOE Joint Genome Institute (JGI)	2593339237	Firmicutes	Clostridia	Clostridiales	Ruminococcaceae	Ruminococcus	Ruminococcus flavefaciens	1265	Gs0033970	Gp0088033	Ga0007626	YL228	Yes	PRJNA254879	SAMN02910280				Isolate	Yes	Whole Genome Sequencing			sheep rumen	Ruminococcus flavefaciens YL228	Complete	Illumina HiSeq 2000, Illumina HiSeq 2500	3365971	2890	15	0	1546268	0.46	2972370	88.37	2952752	87.79	2827	97.82	63	2.18	10	4	4
2593339146	Bacteria	Draft	The Hungate 1000. A catalogue of reference genomes from the rumen microbiome.	Ruminococcus flavefaciens YRD2003	DOE Joint Genome Institute (JGI)	2593339146	Firmicutes	Clostridia	Clostridiales	Ruminococcaceae	Ruminococcus	Ruminococcus flavefaciens	1265	Gs0033970	Gp0088034	Ga0007578	YRD2003	Yes	PRJNA254878	SAMN02910353				Isolate	Yes	Whole Genome Sequencing			cow rumen	Ruminococcus flavefaciens YRD2003	Complete	Illumina HiSeq 2000, Illumina HiSeq 2500	3560550	3115	43	1	1765829	0.5	3142966	88.33	3142966	88.33	3044	97.72	71	2.28	14	4	5
2524023243	Bacteria	Permanent Draft	Genomic Encyclopedia of Type Strains, Phase I: the one thousand microbial genomes (KMG-I) project	Ruminococcus gauvreauii DSM 19829	DOE Joint Genome Institute (JGI)	2524023243	Firmicutes	Clostridia	Clostridiales	Ruminococcaceae	Ruminococcus	Ruminococcus gauvreauii	1123075	Gs0015051	Gp0013236	Ga0002764	DSM 19829	Yes	PRJNA188897	SAMN02441541			Coccus-shaped	Isolate	Yes	Whole Genome Sequencing	Host, Human		Human faecal specimen	Ruminococcus gauvreauii DSM 19829	Complete	Illumina, Illumina HiSeq 2000, Illumina HiSeq 2500	4096548	3918	71	3	1950043	0.48	3740210	91.31	3740210	91.31	3808	97.19	110	2.81	7	0	4
2545555826	Bacteria	Permanent Draft	The Hungate 1000. A catalogue of reference genomes from the rumen microbiome.	Ruminococcus gnavus AGR2154	DOE Joint Genome Institute (JGI)	2545555826	Firmicutes	Clostridia	Clostridiales	Lachnospiraceae	Ruminococcus	Ruminococcus gnavus	1384063	Gs0033970	Gp0036554	Ga0004219	AGR2154	Yes	PRJNA214525	SAMN02584990				Isolate	Yes	Whole Genome Sequencing			neonatal calf faeces	Ruminococcus gnavus AGR2154	Complete	Illumina HiSeq 2000, Illumina HiSeq 2500, PacBio RS	3724077	3784	5	0	1583410	0.43	3377863	90.7	3222257	86.52	3689	97.49	95	2.51	15	5	5
640963057	Bacteria	Permanent Draft	Human Microbiome Project (HMP) Reference Genomes	Ruminococcus gnavus ATCC 29149	Washington University in St. Louis	640963057	Firmicutes	Clostridia	Clostridiales	Lachnospiraceae	Ruminococcus	Ruminococcus gnavus	411470	Gs0016050	Gp0005275	Ga0030182	ATCC 29149	Yes	PRJNA18179	SAMN00627102	Free living		Coccus-shaped	Isolate	Yes	Whole Genome Sequencing	Feces, Gastrointestinal tract, Host, Human intestinal microflora	Homo sapiens	Human feces	Ruminococcus gnavus ATCC 29149	Complete	454-GS20, Sanger	3501911	3982	43	1	1501521	0.43	3231173	92.27	3231173	92.27	3913	98.27	69	1.73	9	2	2
2558860359	Bacteria	Permanent Draft	Human Microbiome Project (HMP) Reference Genomes	Ruminococcus gnavus CC55_001C	Broad Institute	2558860359	Firmicutes	Clostridia	Clostridiales	Lachnospiraceae	Ruminococcus	Ruminococcus gnavus	1073375	Gs0016050	Gp0011562	Ga0023243	CC55_001C	Yes	PRJNA71557	SAMN01162086				Isolate	Yes	Whole Genome Sequencing		Homo sapiens		Ruminococcus gnavus CC55_001C	Complete	Illumina	3177226	3041	12	1	1369299	0.43	2870337	90.34	2870337	90.34	2975	97.83	66	2.17	13	3	5
642791604	Bacteria	Permanent Draft	Human Microbiome Project (HMP) Reference Genomes	Ruminococcus lactaris ATCC 29176	Washington University in St. Louis	642791604	Firmicutes	Clostridia	Clostridiales	Ruminococcaceae	Ruminococcus	Ruminococcus lactaris	471875	Gs0016050	Gp0000888	Ga0030183	ATCC 29176	Yes	PRJNA20557	SAMN00000022	Free living		Coccus-shaped	Isolate	Yes	Whole Genome Sequencing	Feces, Gastrointestinal tract, Host, Human intestinal microflora	Homo sapiens	Human feces	Ruminococcus lactaris ATCC 29176	Complete	454-GS20, Sanger	2729735	2813	62	2	1165516	0.43	2457716	90.03	2457716	90.03	2750	97.76	63	2.24	10	4	1
2558860360	Bacteria	Permanent Draft	Human Microbiome Project (HMP) Reference Genomes	Ruminococcus lactaris CC59_002D	Broad Institute	2558860360	Firmicutes	Clostridia	Clostridiales	Ruminococcaceae	Ruminococcus	Ruminococcus lactaris	1073376	Gs0016050	Gp0011563	Ga0023244	CC59_002D	Yes	PRJNA71573	SAMN01162081				Isolate	Yes	Whole Genome Sequencing		Homo sapiens		Ruminococcus lactaris CC59_002D	Complete	Illumina	3051582	2832	41	3	1295420	0.42	2686158	88.03	2686158	88.03	2765	97.63	67	2.37	15	5	5
650377967	Bacteria	Finished	Human Microbiome Project (HMP) Reference Genomes	Ruminococcus obeum A2-162	Wellcome Trust Sanger Institute	650377967	Firmicutes	Clostridia	Clostridiales	Lachnospiraceae	Ruminococcus	Ruminococcus obeum	40520	Gs0016050	Gp0004518	Ga0030184	A2-162	Yes	PRJNA39167		Free living		Coccus-shaped	Isolate	Yes	Whole Genome Sequencing	Host	Homo sapiens		Ruminococcus obeum A2-162	Complete	454-GS-FLX-Titanium	3757491	3210	1	0	1568732	0.42	2861825	77.51	2861825	77.51	3155	98.29	55	1.71	1	0	1
640963024	Bacteria	Permanent Draft	Human Microbiome Project (HMP) Reference Genomes	Ruminococcus obeum ATCC 29174	Washington University in St. Louis	640963024	Firmicutes	Clostridia	Clostridiales	Lachnospiraceae	Ruminococcus	Ruminococcus obeum	411459	Gs0016050	Gp0000918	Ga0030185	ATCC 29174	Yes	PRJNA18147	SAMN00627103	Free living	Chains, Singles	Coccus-shaped	Isolate	Yes	Whole Genome Sequencing	Feces, Gastrointestinal tract, Host, Human intestinal microflora	Homo sapiens	human feces	Ruminococcus obeum ATCC 29174	Complete	454, Sanger	3624708	4240	62	0	1507511	0.42	3284795	90.62	3284707	90.62	4175	98.47	65	1.53	15	2	5
650377969	Bacteria	Finished	Human Microbiome Project (HMP) Reference Genomes	Ruminococcus sp. 18P13	Wellcome Trust Sanger Institute	650377969	Firmicutes	Clostridia	Clostridiales	Ruminococcaceae	Ruminococcus	Ruminococcus sp. 18P13	213810	Gs0016050	Gp0004519	Ga0030187	18P13	Yes	PRJNA39179		Free living		Coccus-shaped	Isolate	Yes	Whole Genome Sequencing	Feces, Gastrointestinal tract, Host	Homo sapiens	human intestine (feces)	Ruminococcus sp. 18P13	Complete	454	2573208	2162	1	2	1343400	0.53	2000985	79.61	2000985	79.61	2114	97.78	48	2.22	3	1	1
2562617160	Bacteria	Permanent Draft	Human Microbiome Project (HMP) Reference Genomes	Ruminococcus sp. 5_1_39BFAA	Broad Institute	2562617160	Firmicutes	Clostridia	Clostridiales	Ruminococcaceae	Ruminococcus	Ruminococcus sp. 5_1_39BFAA	457412	Gs0016050	Gp0003380	Ga0024113	5_1_39BFAA	Yes	PRJNA32503	SAMN02463719	Free living		Coccus-shaped	Isolate	Yes	Whole Genome Sequencing	Host	Homo sapiens		Ruminococcus sp. 5_1_39BFAA	Complete	454	3930699	3585	3	2	1625400	0.41	3369296	85.72	3369296	85.72	3516	98.08	69	1.92	19	6	7
2585427614	Bacteria	Finished	Ruminococcus sp. 80/3	Ruminococcus sp. 80/3	Institute of Food Research	2585427614	Firmicutes	Clostridia	Clostridiales	Ruminococcaceae	Ruminococcus	Ruminococcus sp. 80/3	1160721	Gs0030972	Gp0020616	Ga0056609	80/3	Yes	PRJEA88543				Coccus-shaped	Isolate	Yes	Whole Genome Sequencing	Human feces	Homo sapiens	Human Feces (washed fiber from feces)	Ruminococcus sp. 80/3	Complete		2968500	2737	2	1	1265304	0.43	2574875	86.74	2525638	85.08	2670	97.55	67	2.45	12	4	4
2558309012	Bacteria	Permanent Draft	The Hungate 1000. A catalogue of reference genomes from the rumen microbiome.	Ruminococcus sp. FC2018	DOE Joint Genome Institute (JGI)	2558309012	Firmicutes	Clostridia	Clostridiales	Ruminococcaceae	Ruminococcus	Ruminococcus sp.	1410617	Gs0033970	Gp0047078	Ga0005573	FC2018	Yes	PRJNA223448	SAMN02744013				Isolate	Yes	Whole Genome Sequencing				Ruminococcus sp. FC2018	Complete	Illumina HiSeq 2000, Illumina HiSeq 2500	2404446	2255	32	1	1102117	0.46	2128484	88.58	2128484	88.58	2193	97.25	62	2.75	6	2	2
2565956529	Bacteria	Permanent Draft	The Hungate 1000. A catalogue of reference genomes from the rumen microbiome.	Ruminococcus sp. HUN007	DOE Joint Genome Institute (JGI)	2565956529	Firmicutes	Clostridia	Clostridiales	Ruminococcaceae	Ruminococcus	Ruminococcus sp.	41978	Gs0033970	Gp0036552	Ga0004217	HUN007	Yes	PRJNA239502	SAMN02744687				Isolate	Yes	Whole Genome Sequencing			sheep rumen	Ruminococcus sp. HUN007	Complete	Illumina HiSeq 2000, Illumina HiSeq 2500, PacBio RS	4207177	3674	4	9	1767540	0.42	3671945	87.28	3517234	83.6	3565	97.03	109	2.97	25	9	8
2548876979	Bacteria	Permanent Draft	Ruminococcus sp. JC304	Ruminococcus sp. JC304	Aix-Marseille University	2548876979	Firmicutes	Clostridia	Clostridiales	Ruminococcaceae	Ruminococcus	Ruminococcus sp. JC304	1095771	Gs0030973	Gp0020524	Ga0020483	JC304	Yes	PRJEA82615	SAMEA2272026				Isolate	Yes	Whole Genome Sequencing		Homo sapiens		Ruminococcus sp. JC304	Complete		4168980	4270	526	1	1633519	0.39	3649512	87.54	3649512	87.54	4181	97.92	89	2.08	2	0	1
2563366504	Bacteria	Permanent Draft	The Hungate 1000. A catalogue of reference genomes from the rumen microbiome.	Ruminococcus sp. NK3A76	DOE Joint Genome Institute (JGI)	2563366504	Firmicutes	Clostridia	Clostridiales	Ruminococcaceae	Ruminococcus	Ruminococcus sp. NK3A76	877411	Gs0033970	Gp0036555	Ga0004220	NK3A76	Yes	PRJNA239510	SAMN02743361				Isolate	Yes	Whole Genome Sequencing			sheep rumen	Ruminococcus sp. NK3A76	Complete	Illumina HiSeq 2000, Illumina HiSeq 2500, PacBio RS	3561124	3241	2	3	1671585	0.47	3120338	87.62	3066234	86.1	3168	97.75	73	2.25	9	3	3
650377968	Bacteria	Finished	Human Microbiome Project (HMP) Reference Genomes	Ruminococcus sp. SR1/5	Wellcome Trust Sanger Institute	650377968	Firmicutes	Clostridia	Clostridiales	Ruminococcaceae	Ruminococcus	Ruminococcus sp.	41978	Gs0016050	Gp0004252	Ga0030186	SR1/5	Yes	PRJNA39149		Free living		Coccus-shaped	Isolate	Yes	Whole Genome Sequencing	Feces, Gastrointestinal tract, Host	Homo sapiens	Human feces	Ruminococcus sp. SR1/5	Complete		3545606	3313	1	3	1551613	0.44	2547723	72.55	2547723	72.55	3260	98.4	53	1.6	2	0	1
2593339149	Bacteria	Draft	The Hungate 1000. A catalogue of reference genomes from the rumen microbiome.	Ruminococcus sp. YE71	DOE Joint Genome Institute (JGI)	2593339149	Firmicutes	Clostridia	Clostridiales	Ruminococcaceae	Ruminococcus	Ruminococcus sp. YE71	244362	Gs0033970	Gp0088035	Ga0007605	YE71	Yes	PRJNA254880	SAMN02910447				Isolate	Yes	Whole Genome Sequencing			sheep rumen	Ruminococcus sp. YE71	Complete	Illumina HiSeq 2000, Illumina HiSeq 2500	4073443	3646	43	2	2079803	0.51	3529086	86.7	3529086	86.7	3581	98.22	65	1.78	8	2	3
2593339151	Bacteria	Draft	The Hungate 1000. A catalogue of reference genomes from the rumen microbiome.	Ruminococcus sp. YE78	DOE Joint Genome Institute (JGI)	2593339151	Firmicutes	Clostridia	Clostridiales	Ruminococcaceae	Ruminococcus	Ruminococcus sp. YE78	1352374	Gs0033970	Gp0088036	Ga0007606	YE78	Yes	PRJNA254883	SAMN02910446				Isolate	Yes	Whole Genome Sequencing			sheep rumen	Ruminococcus sp. YE78	Complete	Illumina HiSeq 2000, Illumina HiSeq 2500	4146682	3744	53	1	2114057	0.51	3590411	86.62	3590411	86.62	3679	98.26	65	1.74	7	2	2
640963025	Bacteria	Permanent Draft	Human Microbiome Project (HMP) Reference Genomes	Ruminococcus torques ATCC 27756	Washington University in St. Louis	640963025	Firmicutes	Clostridia	Clostridiales	Lachnospiraceae	Ruminococcus	Ruminococcus torques	411460	Gs0016050	Gp0000919	Ga0030189	ATCC 27756	Yes	PRJNA18153	SAMN00627104	Free living		Coccus-shaped	Isolate	Yes	Whole Genome Sequencing	Feces, Gastrointestinal tract, Host, Human intestinal microflora	Homo sapiens	human feces	Ruminococcus torques ATCC 27756	Complete	454, Sanger	2739406	2969	64	0	1149768	0.42	2455395	89.63	2455189	89.62	2875	96.83	94	3.17	40	8	12
650377970	Bacteria	Finished	Human Microbiome Project (HMP) Reference Genomes	Ruminococcus torques L2-14	Wellcome Trust Sanger Institute	650377970	Firmicutes	Clostridia	Clostridiales	Lachnospiraceae	Ruminococcus	Ruminococcus torques	33039	Gs0016050	Gp0004520	Ga0030188	L2-14	Yes	PRJNA39169		Free living		Coccus-shaped	Isolate	Yes	Whole Genome Sequencing	Host	Homo sapiens		Ruminococcus torques L2-14	Complete	454-GS-FLX-Titanium	3341681	2848	1	0	1341431	0.41	2566738	78.31	2566738	78.31	2798	98.24	50	1.76	2	0	1
[truncated: 71 more columns]
